# Supplementary material
Source: publisher site journal article supplement (https://www.spandidos-publications.com/4549/downloadSupplementary)
Supplement: Supplementary file 1 [file downloadSupplementary]

## Sheet: Sheet1
Table SVIII. Distribution of alteration types.
A, Distribution of actionable alterations in NSCLC (n=120)					B, Distribution of actionable alterations in BM group (n=26)					C, Distribution of actionable alterations in Non-BM group (n=64)					D, Distribution of alteration types in NSCLC (n=120)				E, Distribution of alteration types in BM group (n=26)				F, Distribution of alteration types in Non-BM group (n=64)
HIGHEST_DRUG	HIGHEST_LEVEL	merge_3_cols	count		HIGHEST_DRUG	HIGHEST_LEVEL	merge_3_cols	count		HIGHEST_DRUG	HIGHEST_LEVEL	merge_3_cols	count		Hugo_Symbol	Variant_Classification	Count		Hugo_Symbol	Variant_Classification	Count		Hugo_Symbol	Variant_Classification	Count
Afatinib	LEVEL_1	EGFR:Missense_Mutation:p.L594Q	1		Erlotinib,Erlotinib+Ramucirumab	LEVEL_1	EGFR:In_Frame_Del:p.478_483del|EGFR:In_Frame_Del:p.478_483del|EGFR:In_Frame_Del:p.479_483del|EGFR:In_Frame_Del:p.479_483del|EGFR:Missense_Mutation:p.L591R|EGFR:Missense_Mutation:p.L591R|EGFR:Missense_Mutation:p.L591R|EGFR:In_Frame_Del:p.478_483del|EGFR:In_Frame_Del:p.478_483del|EGFR:In_Frame_Del:p.479_484del|EGFR:In_Frame_Del:p.479_484del	11		Afatinib	LEVEL_1	EGFR:Missense_Mutation:p.L594Q	1		EGFR	In_Frame_Del	14		EGFR	In_Frame_Del	6		EGFR	In_Frame_Del	8
Alpelisib+Fulvestrant	LEVEL_1	PIK3CA:Missense_Mutation:p.E542K|PIK3CA:Missense_Mutation:p.E545K|PIK3CA:Missense_Mutation:p.C420R	3		Cobimetinib,Trametinib	LEVEL_2	NRAS:Missense_Mutation:p.Q61L	1		Alpelisib+Fulvestrant	LEVEL_1	PIK3CA:Missense_Mutation:p.E542K|PIK3CA:Missense_Mutation:p.E545K|PIK3CA:Missense_Mutation:p.C420R	3		PIK3CA	In_Frame_Del	1		EGFR	Missense_Mutation	3		PIK3CA	In_Frame_Del	1
Amivantamab,Mobocertinib	LEVEL_1	EGFR:In_Frame_Ins:p.D503delinsDNPH	1							Amivantamab,Mobocertinib	LEVEL_1	EGFR:In_Frame_Ins:p.D503delinsDNPH	1		EGFR	In_Frame_Ins	2		NRAS	Missense_Mutation	1		EGFR	In_Frame_Ins	2
Avapritinib	LEVEL_1	PDGFRA:Missense_Mutation:p.I831T|PDGFRA:Missense_Mutation:p.D846H	2							Avapritinib	LEVEL_1	PDGFRA:Missense_Mutation:p.I831T|PDGFRA:Missense_Mutation:p.D846H	2		ATM	Missense_Mutation	1						ATM	Missense_Mutation	1
Dabrafenib,Dabrafenib+Trametinib	LEVEL_1	BRAF:Missense_Mutation:p.V600E	1							Dabrafenib,Dabrafenib+Trametinib	LEVEL_1	BRAF:Missense_Mutation:p.V600E	1		BRAF	Missense_Mutation	1						BRAF	Missense_Mutation	1
Erlotinib,Erlotinib+Ramucirumab	LEVEL_1	EGFR:Missense_Mutation:p.L591R|EGFR:In_Frame_Del:p.478_483del|EGFR:In_Frame_Del:p.478_483del|EGFR:Missense_Mutation:p.L591R|EGFR:In_Frame_Del:p.478_483del|EGFR:In_Frame_Del:p.478_483del|EGFR:Missense_Mutation:p.L591R|EGFR:In_Frame_Del:p.479_483del|EGFR:In_Frame_Del:p.479_483del|EGFR:In_Frame_Del:p.479_483del|EGFR:In_Frame_Del:p.479_483del|EGFR:In_Frame_Del:p.479_483del|EGFR:In_Frame_Del:p.479_483…	33							Erlotinib,Erlotinib+Ramucirumab	LEVEL_1	EGFR:Missense_Mutation:p.L591R|EGFR:Missense_Mutation:p.L591R|EGFR:In_Frame_Del:p.478_483del|EGFR:In_Frame_Del:p.478_483del|EGFR:Missense_Mutation:p.L591R|EGFR:In_Frame_Del:p.479_483del|EGFR:In_Frame_Del:p.479_483del|EGFR:In_Frame_Del:p.479_483del|EGFR:In_Frame_Del:p.479_483del|EGFR:Missense_Mutation:p.L591R|EGFR:In_Frame_Del:p.479_483del|EGFR:In_Frame_Del:p.479_483del|EGFR:Missense_Mutation:p.L5…	22		CDKN2A	Missense_Mutation	2						CDKN2A	Missense_Mutation	2
Ivosidenib	LEVEL_1	IDH1:Missense_Mutation:p.R132C	1							Ivosidenib	LEVEL_1	IDH1:Missense_Mutation:p.R132C	1		EGFR	Missense_Mutation	15						EGFR	Missense_Mutation	12
Olaparib	LEVEL_1	ATM:Nonsense_Mutation:p.R3047X	1							Olaparib	LEVEL_1	ATM:Nonsense_Mutation:p.R3047X	1		IDH1	Missense_Mutation	1						IDH1	Missense_Mutation	1
Osimertinib	LEVEL_1	EGFR:Missense_Mutation:p.T523M	1							Osimertinib	LEVEL_1	EGFR:Missense_Mutation:p.T523M	1		NRAS	Missense_Mutation	2						NRAS	Missense_Mutation	1
Alpelisib+Fulvestrant	LEVEL_2	PIK3CA:Missense_Mutation:p.Q546K|PIK3CA:In_Frame_Del:p.109_109del	2							Alpelisib+Fulvestrant	LEVEL_2	PIK3CA:Missense_Mutation:p.Q546K|PIK3CA:In_Frame_Del:p.109_109del	2		PDGFRA	Missense_Mutation	2						PDGFRA	Missense_Mutation	2
Cobimetinib,Trametinib	LEVEL_2	NRAS:Missense_Mutation:p.G12D|NRAS:Missense_Mutation:p.Q61L	2							Cobimetinib,Trametinib	LEVEL_2	NRAS:Missense_Mutation:p.G12D	1		PIK3CA	Missense_Mutation	5						PIK3CA	Missense_Mutation	5
Erlotinib,Gefitinib	LEVEL_3A	EGFR:In_Frame_Ins:p.V471delinsVKIPVAI	1							Erlotinib,Gefitinib	LEVEL_3A	EGFR:In_Frame_Ins:p.V471delinsVKIPVAI	1		ATM	Nonsense_Mutation	1						ATM	Nonsense_Mutation	1
Palbociclib,Ribociclib	LEVEL_4	CDKN2A:Missense_Mutation:p.Q50L	1							Palbociclib,Ribociclib	LEVEL_4	CDKN2A:Missense_Mutation:p.Q50L	1
